# Supplementary material for: A Genome-Wide View of Transcriptional Responses during Aphis glycines Infestation in Soybean
Source: MDPI journal article supplement (doi:10.3390/ijms21155191), 2020-07-22
Supplement: s1 [file s1]

A

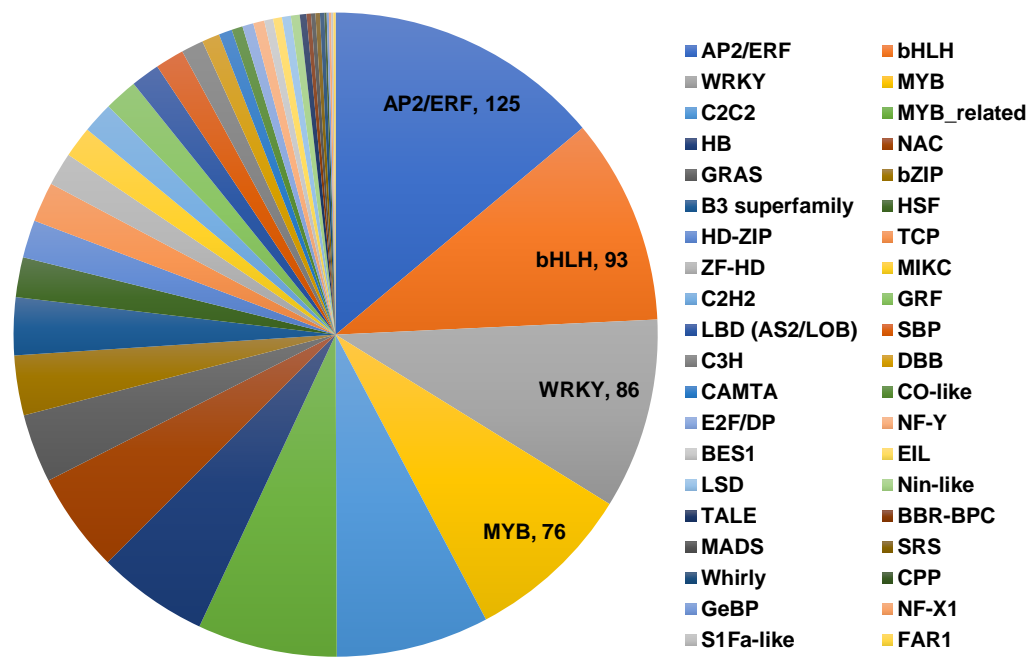

B

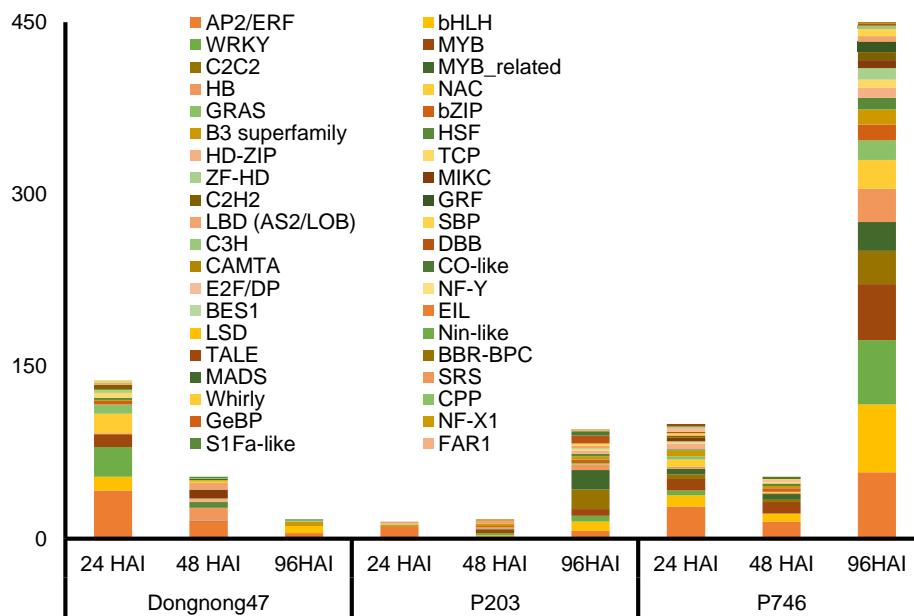

**Figure S4** Distribution of different expressed transcription factors (TF). (A) Numbers of TFs in each families. (B) Differential expressed in all genotypes
