# Supplementary material for: A Genome-Wide View of Transcriptional Responses during Aphis glycines Infestation in Soybean
Source: MDPI journal article supplement (doi:10.3390/ijms21155191), 2020-07-22
Supplement: s1 [file s1]

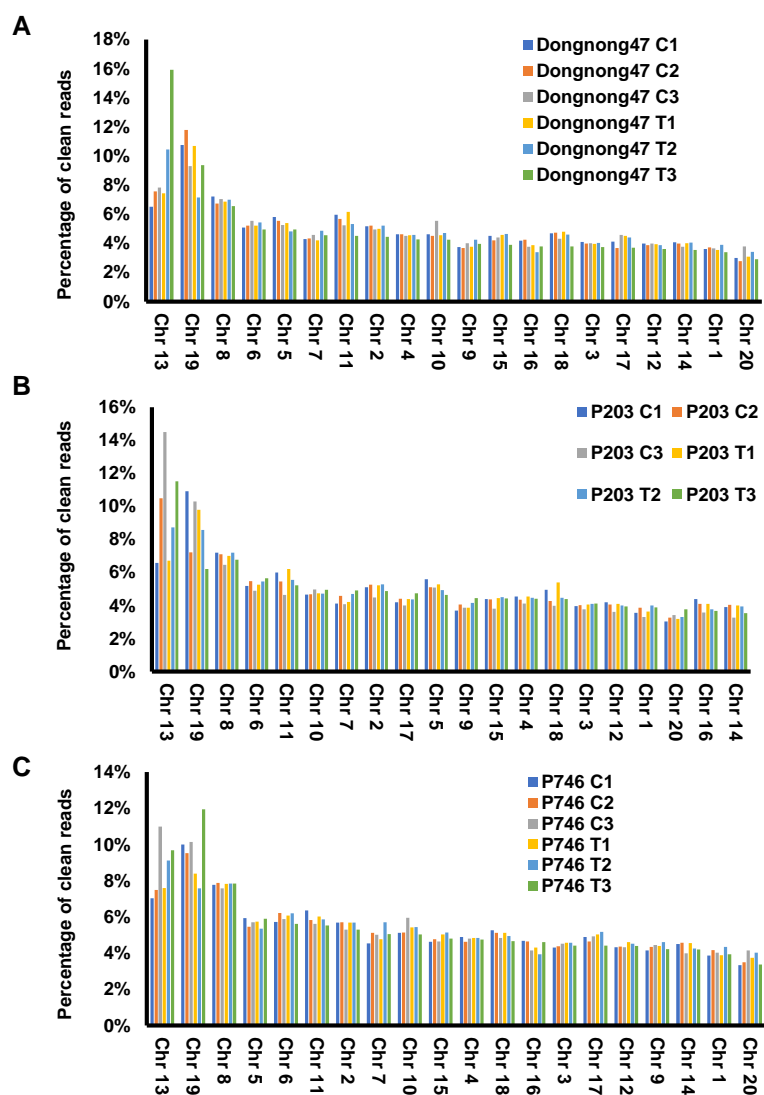

**Figure S1** Distribution of clean reads on chromosomes in soybean cultivars Dongnong47 (A), P203 (B), and P746 (C). C1, mock treatment at 24 h after infestation (HAI); C2, mock treatment at 48 HAI; C3, mock treatment at 96 HAI; T1, aphid infestation at 24 HAI; T2, aphid infestation at 48 HAI; T3, aphid infestation at 96 HAI.
