# Supplementary material for: A Genome-Wide View of Transcriptional Responses during Aphis glycines Infestation in Soybean
Source: MDPI journal article supplement (doi:10.3390/ijms21155191), 2020-07-22
Supplement: s1 [file s1]

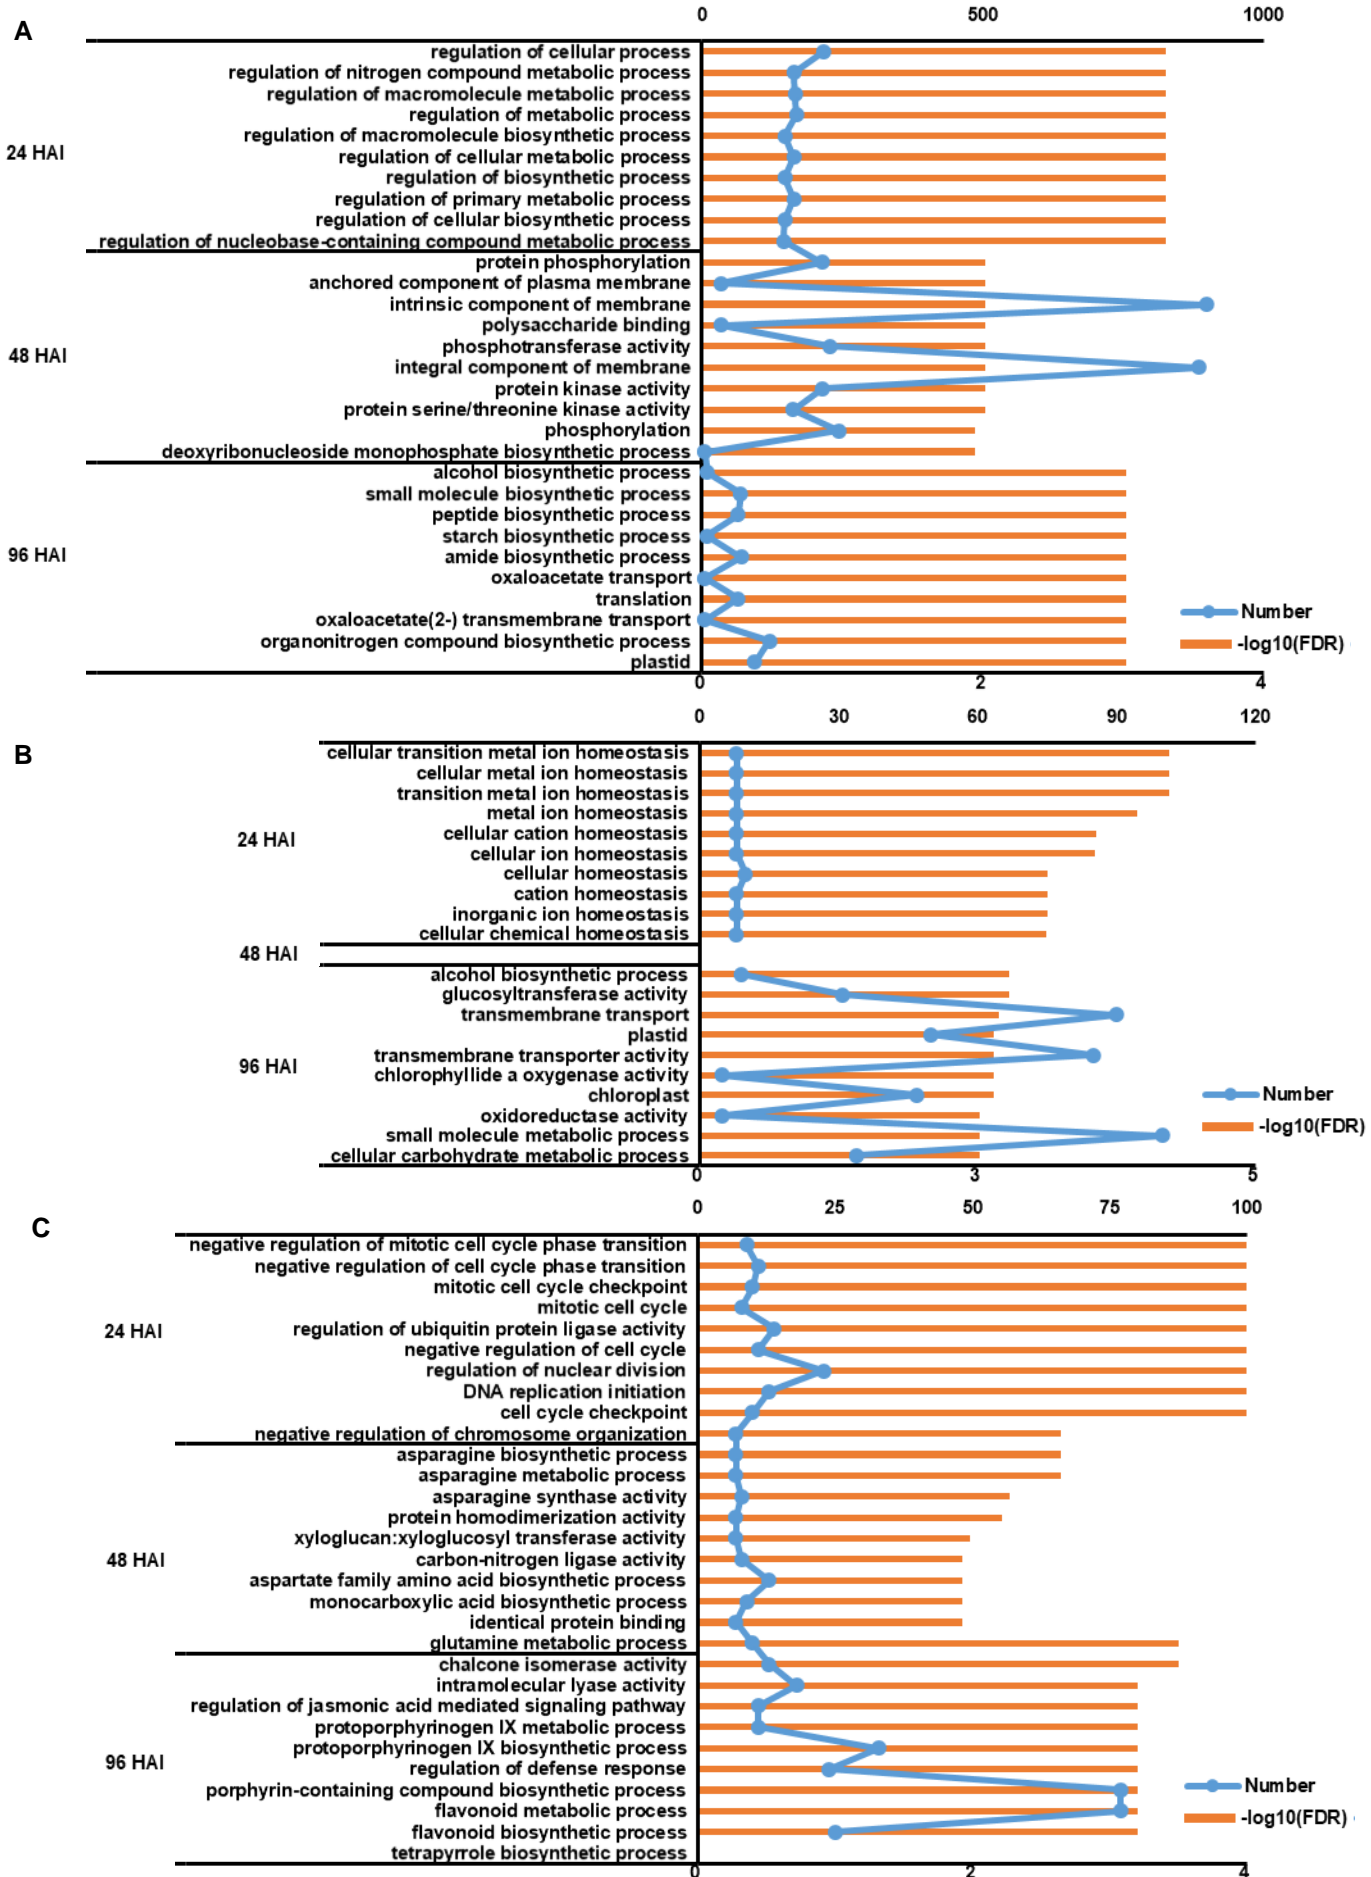

**Figure S2** Top 10 significantly enriched (FDR<0.05) GO terms in Dongnong47 (D47) (A), P203 (B) and P746 (C) at 24, 48 and 96 HAI respectively.
